# Supplementary material
Source: publisher figshare collection journal article supplement (https://acs.figshare.com/ndownloader/files/3860068)
Supplement: Supplementary file 1 [file 3860068]

# Surface Disordering and Film Formation on Ice Induced by Formaldehyde and Acetaldehyde

## SUPPORTING INFORMATION

*Min H. Kuo, Samar G. Moussa<sup>†</sup>, and V. Faye McNeill\**

Chemical Engineering Department, Columbia University in the City of New York,

500 W 120<sup>th</sup> Street, New York, NY 10027

\* Author to whom correspondence should be addressed: Email [vfm2103@columbia.edu](mailto:vfm2103@columbia.edu);

Phone (212) 854-2869; Fax (212) 854-3054

<sup>†</sup> Current address: Atmospheric Science and Technology Directorate, Science and

Technology Branch, Environment Canada, 4905 Dufferin Street, Toronto, Ontario, Canada.

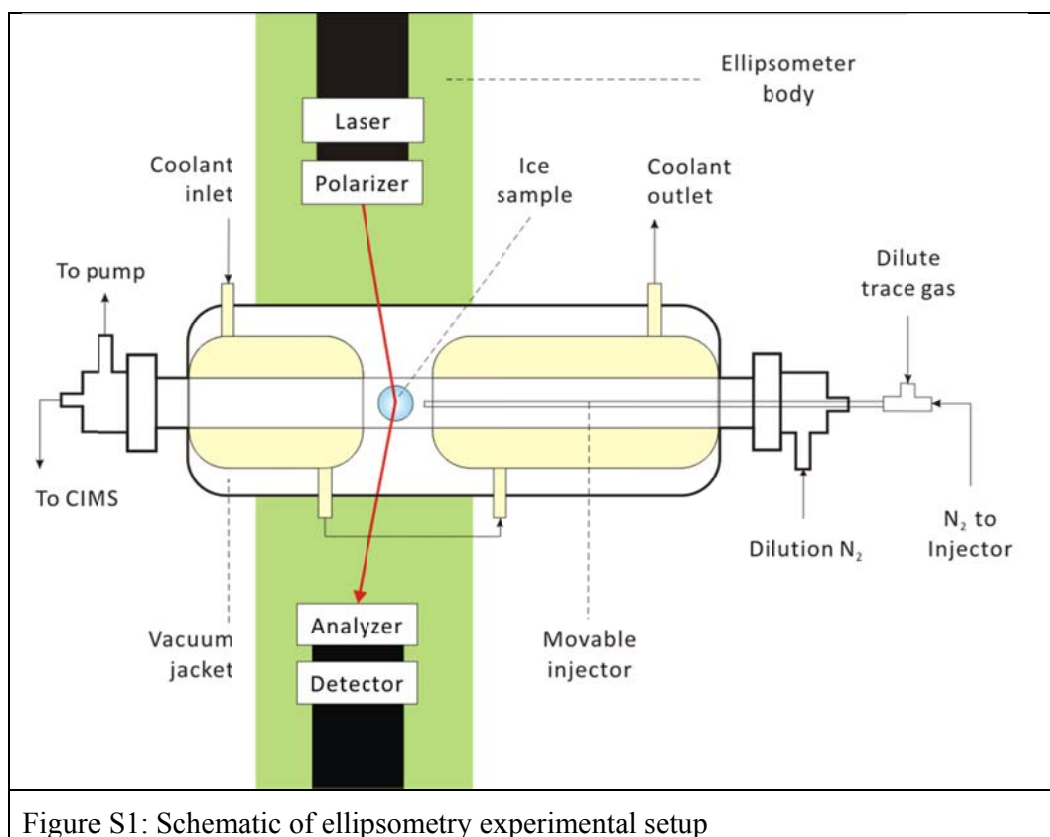

Figure S1: Schematic of ellipsometry experimental setup
